# Supplementary material for: Studying the Structural Significance of Galectin Design by Playing a Modular Puzzle: Homodimer Generation from Human Tandem-Repeat-Type (Heterodimeric) Galectin-8 by Domain Shuffling
Source: PubMed Central journal article supplement (PMC6151538; doi:10.3390/molecules22091572), 2017-09-19
Supplement: molecules-22-01572-s001.pdf [file molecules-22-01572-s001.pdf]

**Figure S1**

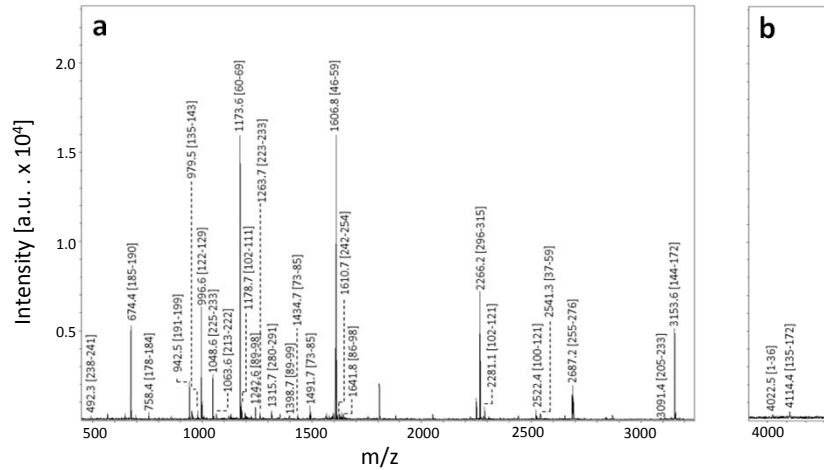

| Sequence                                   | [MH] <sup>+</sup> (mono) calc | [MH] <sup>+</sup> (mono) exp |
|--------------------------------------------|-------------------------------|------------------------------|
| AFVR                                       | 492.3                         | 492.3                        |
| LPFAAR                                     | 674.4                         | 674.4                        |
| SGTPQLR                                    | 758.4                         | 758.4                        |
| LNTPMGPGR                                  | 942.5                         | 942.5                        |
| IDTLGIYVK                                  | 979.5                         | 979.5                        |
| HTLLYGHR                                   | 996.5                         | 996.6                        |
| DIALHLNPR                                  | 1048.6                        | 1048.6                       |
| SFNVDLLAGK                                 | 1063.6                        | 1063.6                       |
| ADVAHFHNPFR                                | 1173.6                        | 1173.6                       |
| SFEIVIMVLK                                 | 1178.7                        | 1178.7                       |
| EEITYDTPFK                                 | 1242.6                        | 1242.6                       |
| SKDIALHLNPR                                | 1263.7                        | 1263.7                       |
| VAVNGVHLSLEYK                              | 1315.7                        | 1315.7                       |
| EEITYDTPFKR                                | 1398.7                        | 1398.7                       |
| AGCIVCNTLINEK <sup>1</sup>                 | 1434.7                        | 1434.7                       |
| AGCIVCNTLINEK <sup>1,1</sup>               | 1491.7                        | 1491.7                       |
| FQVDLQNGSSMKPR                             | 1606.8                        | 1606.8                       |
| NSFLQESWGEEER                              | 1610.7                        | 1610.7                       |
| WGREEITYDTPFK                              | 1641.8                        | 1641.8                       |
| ELSSIDTLEINGDIHLLLEVR                      | 2266.2                        | 2266.2                       |
| SFEIVIMVLKDKFQVAVNGK <sup>2</sup>          | 2281.3                        | 2281.1                       |
| EKSFEIVIMVLKDKFQVAVNGK                     | 2522.4                        | 2522.4                       |
| GHVPSDADRFQVDLQNGSSMKPR                    | 2541.2                        | 2541.3                       |
| NITSPFSPGMYFEMIIYCDVR                      | 2687.2                        | 2687.2                       |
| GEVNANAKSFNVDLLAGKSKDIALHLNPR <sup>1</sup> | 3091.7                        | 3091.4                       |
| VNIHSIGFSFSSDLQSTQASSLELLEISR              | 3153.6                        | 3153.6                       |
| MMLSLNNLQNIYNPVIFVGTIPDQLDPTGLIVIR         | 4022.2                        | 4022.5                       |
| IDTLGIYKVNHSIGFSFSSDLQSTQASSLELLEISR       | 4114.1                        | 4114.4                       |

<sup>1</sup> carbamidomethylation at C

<sup>2</sup> oxidation at M

**d** MMLSLNNLQNIYNPVIFVGTIPDQLDPTGLIVIRGHVPSDADRFQVDLQNGSSMKPRADVAHFHNPFRKAGCIVCNTLINEK  
 WGREEITYDTPFKREKSFEIVIMVLKDKFQVAVNGKHTLLYGHRIGPEKIDTLGIYKVNHSIGFSFSSDLQSTQASSLELLEISREN  
 VPKSGTPQLRPLFAARLNTPMGPGRVTVVVKGEVNANAKSFNVDLLAGKSKDIALHLNPRNLKAFVRNSFLQESWGEEERNITS  
 PFSPGMYFEMIIYCDVREFKAVAVNGVHLSLEYKHRFKELSSIDTLEINGDIHLLLEVRWSW

**Supporting Information Figure S1.** Mass spectrometric fingerprinting of peptides obtained by treatment of Gal-8S (NC) with trypsin. The annotated spectrum (**a,b**), the list of detected peptides with their calculated (calc) and experimentally (exp) measured mass values (**c**) and the sequence coverage (**d**) are shown.

## Figure S2

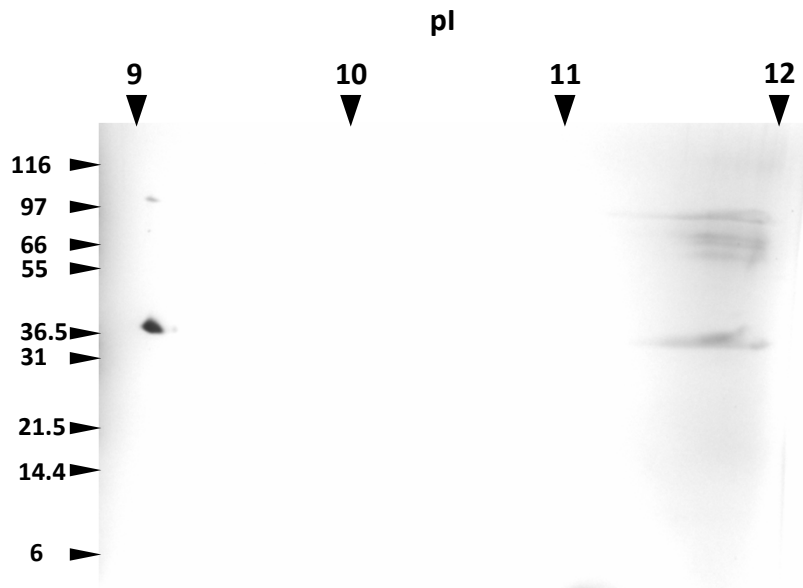

**Supporting Information Figure S2.** 2D Gel electrophoretic analysis of Gal-8 (NN): protein (10  $\mu$ g) was dissolved in 155  $\mu$ l of a solution containing 8 M urea, 20 mM DTT and 2% CHAPS, then loaded on an IEF strip (Zoom IPTG strip pH 9-12; Thermo Fischer Scientific, Dreieich, Germany) and focused in a ZOOM IPG Runner Cell. In the second dimension, a NuPAGE Novex 4-12% Bis-Tris gel (Thermo Fischer Scientific) was applied with a set of marker proteins, as shown on the left side. Finally, the gel was silver stained to reveal the position of the protein.

## Table S1a

Calculated and experimental masses of c-ions observed in the reISD spectra for Gal-8 (NN).

| c-ions | [MH] <sup>+</sup> (av) calc | [MH] <sup>+</sup> (av) exp |
|--------|-----------------------------|----------------------------|
| c36    | 4023.8                      | 4024.4                     |
| c37    | 4080.8                      | 4080.3                     |
| c38    | 4218.0                      | 4218.7                     |
| c39    | 4317.1                      | -*                         |
| c40    | 4414.2                      | 4414.3                     |
| c41    | 4501.3                      | 4501.0                     |
| c42    | 4616.4                      | 4616.8                     |
| c43    | 4687.5                      | 4687.1                     |
| c44    | 4802.6                      | 4802.4                     |
| c45    | 4958.7                      | 4958.1                     |

Calculated and experimental masses of c-ions observed in the linISD spectra for Gal-8 (NN).

| c-ions | [MH] <sup>+</sup> (av) calc | [MH] <sup>+</sup> (av) exp |
|--------|-----------------------------|----------------------------|
| c41    | 4501.3                      | 4499.8                     |
| c42    | 4616.4                      | 4615.0                     |
| c43    | 4687.5                      | 4685.9                     |
| c44    | 4802.6                      | 4800.7                     |
| c45    | 4958.7                      | 4958.5                     |
| c46    | 5105.9                      | 5105.4                     |
| c47    | 5234.0                      | 5234.0                     |
| c48    | 5333.2                      | 5332.8                     |
| c49    | 5448.3                      | 5448.6                     |
| c50    | 5561.4                      | 5561.9                     |
| c51    | 5689.6                      | 5690.7                     |
| c52    | 5803.7                      | 5802.2                     |
| c53    | 5860.7                      | 5861.6                     |
| c54    | 5947.8                      | 5947.8                     |
| c55    | 6034.9                      | 6034.1                     |
| c56    | 6166.1                      | 6166.4                     |
| c57    | 6294.2                      | -*                         |
| c58    | 6391.4                      | 6391.4                     |
| c59    | 6547.5                      | 6547.0                     |
| c60    | 6618.6                      | 6618.4                     |
| c61    | 6733.7                      | -*                         |
| c62    | 6832.8                      | 6831.4                     |
| c63    | 6903.9                      | 6904.4                     |
| c64    | 7051.1                      | 7051.1                     |
| c65    | 7188.2                      | 7187.9                     |
| c66    | 7335.4                      | 7336.2                     |
| c67    | 7449.5                      | -*                         |
| c68    | 7546.6                      | 7545.9                     |
| c69    | 7702.8                      | 7702.3                     |
| c70    | 7850.0                      | 7849.3                     |
| c71    | 7978.2                      | 7978.0                     |
| c72    | 8134.3                      | 8134.1                     |

\* C-ions not observed

## Table S1b

Calculated and experimental masses of z+2-ions observed in the reISD spectra for Gal-8 (NN).

| z+2-ions | [MH] <sup>+</sup> (av) calc | [MH] <sup>+</sup> (av) exp |
|----------|-----------------------------|----------------------------|
| z+2 22   | 2366.7                      | 2366.5                     |
| z+2 23   | 2503.9                      | 2503.5                     |
| z+2 24   | 2560.9                      | 2560.8                     |
| z+2 25   | 2724.1                      | 2723.7                     |
| z+2 26   | 2837.3                      | 2837.6                     |
| z+2 27   | 2950.4                      | 2950.1                     |
| z+2 28   | 3051.5                      | 3051.6                     |
| z+2 29   | 3188.7                      | 3188.8                     |
| z+2 30   | 3316.8                      | 3316.6                     |
| z+2 31   | 3373.9                      | 3374.2                     |
| z+2 32   | 3488.0                      | 3487.6                     |

Calculated and experimental masses of y-ions observed in the reISD spectra for Gal-8 (NN).

| y-ions | [MH] <sup>+</sup> (av) calc | [MH] <sup>+</sup> (av) exp |
|--------|-----------------------------|----------------------------|
| y23    | 2518.9                      | 2518.8                     |
| y24    | 2575.9                      | 2575.8                     |
| y25    | 2739.1                      | 2738.8                     |
| y26    | 2852.3                      | -*                         |
| y27    | 2965.4                      | 2965.8                     |
| y28    | 3066.5                      | 3066.4                     |
| y29    | 3203.7                      | 3203.8                     |
| y30    | 3331.8                      | 3331.1                     |
| y31    | 3388.9                      | 3388.6                     |
| y32    | 3503.0                      | 3502.3                     |
| y33    | 3602.1                      | 3602.3                     |

\* y-ions not observed
